# Supplementary material for: Determination of seven tetracyclines in milk by dissolvable layered double hydroxide-based solid-phase extraction coupled with high-performance liquid chromatography
Source: Royal Society of Chemistry journal article supplement (doi:10.1039/d1ay00154j), 2021-01-01
Supplement: d1ay00154j1.pdf [file d1ay00154j1.pdf]

## Electronic Supplementary Information

### **Determination of seven tetracyclines in milk by dissolvable layered double hydroxide-based solid-phase extraction coupled with high-performance liquid chromatography**

Yi Yang,<sup>†a,b</sup> Jing Zhang,<sup>†b</sup> Yongxin Li,<sup>b</sup> Shuo Yin,<sup>b</sup> Yang Jiang<sup>c</sup> and Chengjun Sun<sup>\*b</sup>

<sup>a</sup> School of Public Health, Southwest Medical University, Luzhou 646000, China

<sup>b</sup> West China School of Public Health and West China Fourth Hospital, Sichuan University, Chengdu 610041, China

<sup>c</sup> Sichuan Center for Disease Control and Prevention, Chengdu 610041, China

<sup>†</sup> These authors contributed equally to this work

\*Corresponding author (C. Sun): Fax: +86 28 85501301; E-mail: [sunchj@scu.edu.cn](mailto:sunchj@scu.edu.cn)

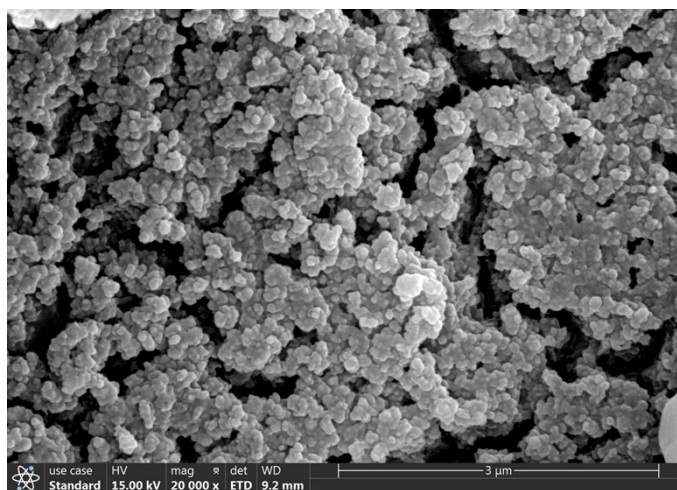

**Fig. S1** SEM image of the Mg/Al LDH

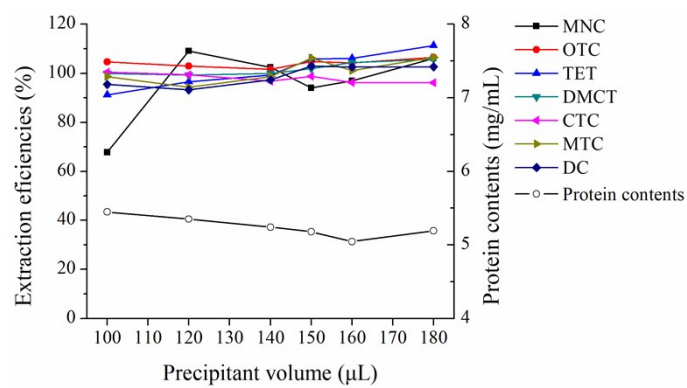

**Fig. S2** Effect of precipitant volume on extraction efficiencies of TCs and protein contents

## LC-MS/MS validation method

The determination results of milk samples of the developed LDH-based SPE-HPLC method were verified with an LC-MS/MS method. An LCMS-8050 system (Shimadzu, Japan) was used. Chromatographic separation was achieved on a Waters Acquity UPLC<sup>®</sup> BEH C<sub>18</sub> column (1.7  $\mu$ m, 2.1 $\times$ 50 mm) with the column oven temperature maintained at 40 °C. Methanol and 0.1% oxalic acid solution were used as the mobile phase at a flow rate of 0.2 mL/min with their volume percentage changed from 15:85 to 80:20 in 9 min. The MS/MS detection was performed with positive ion ESI and in MRM mode. Detailed MS parameters are listed in Table S1. Fig. S3 is the MRM chromatogram of a mixed standard solution. Fig. S4 shows the MRM chromatogram of a milk sample spiked with 200  $\mu$ g L<sup>-1</sup> TCs. Fig. S5 is the MRM chromatogram of a milk sample that contains no TC.

**Table S1** LC-MS/MS parameters for tetracyclines

| Tetracyclines | Retention time (min) | Qualitative ion pair (m/z) | Quantitative ion pairs (m/z) | Collision voltage (V) |
|---------------|----------------------|----------------------------|------------------------------|-----------------------|
| MNC           | 4.49                 | 458.20/441.20              | 458.20/441.20                | 21.0                  |
|               |                      |                            | 458.20/352.10                | 30.0                  |
| OTC           | 5.08                 | 461.25/426.10              | 461.25/426.10                | 19.0                  |
|               |                      |                            | 461.25/ 443.10               | 15.0                  |
| TET           | 4.89                 | 444.95/410.10              | 444.95/410.10                | 20.0                  |
|               |                      |                            | 444.95/ 427.10               | 11.0                  |
| DMCT          | 5.58                 | 465.35/447.90              | 465.35/447.90                | 17.0                  |
|               |                      |                            | 465.35/430.10                | 20.0                  |
| CTC           | 6.41                 | 479.40/444.00              | 479.40/444.00                | 17.0                  |
|               |                      |                            | 479.40/462.00                | 17.0                  |
| MTC           | 7.03                 | 443.15/426.10              | 443.15/426.10                | 15.0                  |
|               |                      |                            | 443.15/381.05                | 22.0                  |
| DC            | 7.40                 | 445.15/428.10              | 445.15/428.10                | 19.0                  |
|               |                      |                            | 445.15/410.10                | 20.0                  |

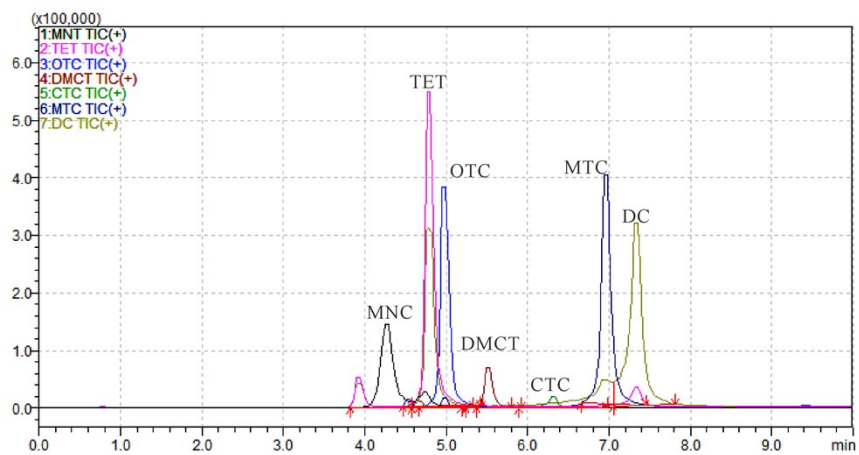

**Fig. S3** LC-MS/MS chromatogram of seven TCs in water ( $200 \mu\text{g L}^{-1}$ , injection volume:  $1 \mu\text{L}$ )

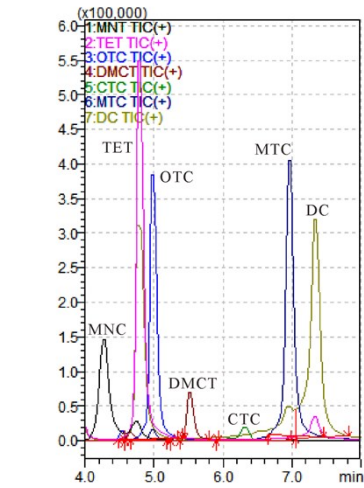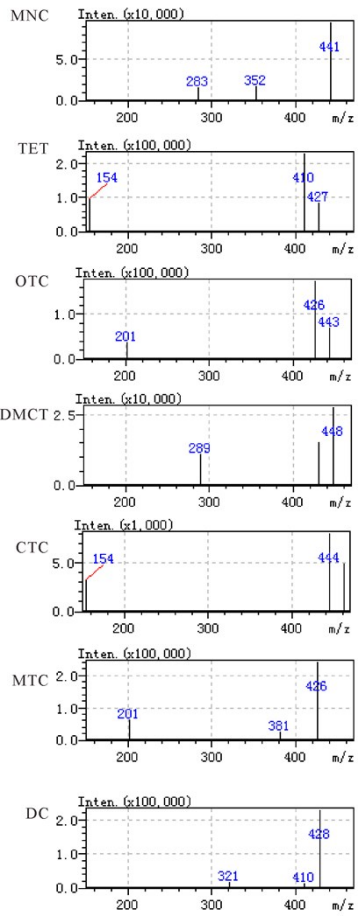

**Fig. S4** MRM chromatogram of a milk sample spiked with 200 µg L<sup>-1</sup> TCs

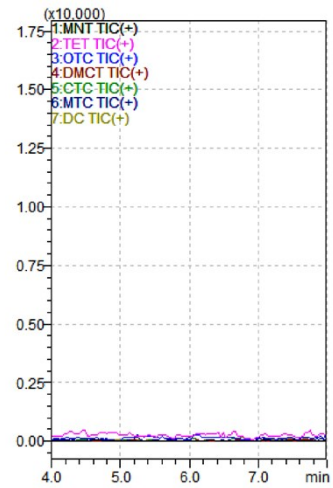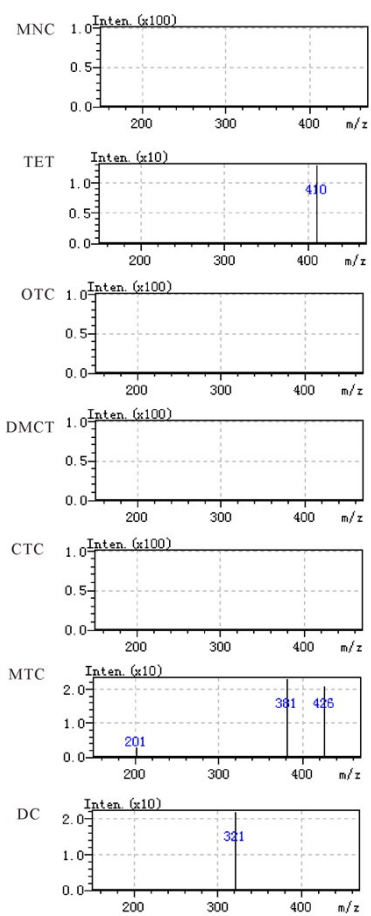

**Fig. S5** MRM chromatogram of a milk sample

spiked with 200 µg L<sup>-1</sup> TCs
